# Supplementary material for: Self-association of short DNA loops through minor groove C:G:G:C tetrads
Source: PubMed Central journal article supplement — Nucleic Acids Res. 2009 Mar 24;37(10):3264–75. doi: 10.1093/nar/gkp191 (PMC2691830; doi:10.1093/nar/gkp191), 2009-03-24
Supplement: gkp191_1.pdf [file gkp191_1.pdf]

## SUPPLEMENTARY DATA

### Self-association of short DNA loops through Minor Groove C:G:G:C Tetrads.

*Júlia Viladoms, Núria Escaja, Miriam Frieden, Irene Gómez-Pinto, Enrique Pedroso & Carlos González*

**Table S1-** <sup>1</sup>H assignments for the dimeric form of d<pCGCTCCGT> (100 mM NaCl, phosphate buffer pH7, T=35°C).

|           | NH    | NH <sub>2</sub> (2) | NH <sub>2</sub> (1) | H6/H8 | H2/H5/Me | H1'  | H2'  | H2'' | H3'  | H4'  | H5'H5'' |      |
|-----------|-------|---------------------|---------------------|-------|----------|------|------|------|------|------|---------|------|
| <b>C1</b> | --    | n.o.                | n.o.                | 8.02  | 6.11     | 6.48 | 2.26 | 2.59 | 4.57 | 4.18 | n.a.    | n.a. |
| <b>G2</b> | 13.45 | 9.18                | 5.91                | 8.14  | --       | 6.24 | 2.77 | 2.97 | 5.02 | 4.58 | 4.03    | 4.23 |
| <b>C3</b> | --    | 8.79                | 6.53                | 7.43  | 5.38     | 6.28 | 2.33 | 2.44 | 4.98 | 4.31 | n.a.    | n.a. |
| <b>T4</b> | 10.5  | --                  | --                  | 7.53  | 1.66     | 5.98 | 1.88 | 2.39 | 4.71 | 3.78 | 3.78    | 3.91 |
| <b>C5</b> | --    | n.o.                | n.o.                | 8.02  | 6.11     | 6.44 | 2.26 | 2.60 | 4.63 | n.a. | n.a.    | n.a. |
| <b>C6</b> | --    | 9.14                | 6.99                | 7.74  | 5.98     | 6.31 | 2.22 | 2.73 | 4.93 | 4.37 | 4.05    | 4.18 |
| <b>G7</b> | 13.59 | 9.12                | 7.02                | 7.92  | --       | 6.29 | 2.80 | 2.53 | 5.13 | 4.80 | 4.22    | 4.33 |
| <b>T8</b> | 10.80 | --                  | --                  | 7.42  | 1.86     | 5.93 | 2.40 | 2.40 | 4.64 | 3.46 | 3.23    | 3.63 |

n.o – not observed. n.a – not assigned.

**Table S2-** <sup>1</sup>H assignments for the dimeric form of d(TGCTTCGT) (100 mM NaCl, 10 mM MgCl<sub>2</sub>, phosphate buffer pH 7, T=5°C).

|           | NH    | NH <sub>2</sub> (2) | NH <sub>2</sub> (1) | H6/H8 | H2/H5/Me | H1'  | H2'  | H2'' | H3'  | H4'  | H5'H5'' |      |
|-----------|-------|---------------------|---------------------|-------|----------|------|------|------|------|------|---------|------|
| <b>T1</b> | n.o.  | -                   | -                   | 7.72  | 1.93     | 6.41 | 2.48 | 2.62 | 4.90 | 4.30 | 3.89    | n.a. |
| <b>G2</b> | 13.52 | 9.11                | 6.04                | 8.11  | -        | 6.25 | 2.77 | 2.99 | 5.04 | 4.62 | 4.06    | 4.19 |
| <b>C3</b> | -     | 8.77                | 6.55                | 7.45  | 5.38     | 6.31 | 2.35 | 2.44 | 5.00 | 4.34 | 4.08    | n.a. |
| <b>T4</b> | **    | -                   | -                   | 7.52  | 1.66     | 5.99 | 1.90 | 2.41 | 4.71 | 3.76 | n.a.    | n.a. |
| <b>T5</b> | n.o.  | -                   | -                   | 7.86  | 1.94     | 6.48 | 2.32 | 2.54 | 4.64 | n.a. | 3.91    | 4.21 |
| <b>C6</b> | -     | 9.13                | 7.12                | 7.78  | 6.03     | 6.32 | 2.26 | 2.72 | 4.96 | 4.36 | n.a.    | n.a. |
| <b>G7</b> | 13.63 | 9.16                | 7.08                | 8.00  | -        | 6.22 | 2.83 | 2.54 | 5.16 | 4.81 | 4.23    | 4.35 |
| <b>T8</b> | **    | -                   | -                   | 7.43  | 1.86     | 5.83 | 1.92 | 2.27 | 4.33 | 3.61 | 3.41    | 3.75 |

n.o – not observed. n.a – not assigned. \*\* Imino protons of T4 and T8 resonate at 10.47 and 10.83 ppm.

**Table S3-** <sup>1</sup>H assignments for the dimeric form of d(TCGTTGCT) (100 mM NaCl, 10 mM MgCl<sub>2</sub>, phosphate buffer pH 7, T=5°C).

|           | NH    | NH <sub>2</sub> (2) | NH <sub>2</sub> (1) | H6/H8 | H2/H5/Me | H1'  | H2'  | H2'' | H3'  | H4'  | H5'H5'' |      |
|-----------|-------|---------------------|---------------------|-------|----------|------|------|------|------|------|---------|------|
| <b>T1</b> | n.o.  | -                   | -                   | 7.71  | 1.91     | 6.38 | 2.47 | 2.58 | 4.87 | 4.27 | 3.88    | n.a. |
| <b>C2</b> | -     | 9.01                | 6.88                | 7.74  | 5.99     | 6.32 | 2.25 | 2.72 | 5.01 | 4.33 | 4.15    | n.a. |
| <b>G3</b> | 13.63 | 8.99                | 7.15                | 8.04  | -        | 6.31 | 2.84 | 2.53 | 5.12 | 5.00 | n.a.    | n.a. |
| <b>T4</b> | **    | -                   | -                   | 7.39  | 1.81     | 5.90 | 1.93 | 2.39 | 4.66 | 3.36 | 3.18    | 3.63 |
| <b>T5</b> | n.o.  | -                   | -                   | 7.85  | 1.93     | 6.49 | 2.30 | 2.51 | 4.58 | 4.02 | n.a.    | n.a. |
| <b>G6</b> | 13.51 | 9.13                | 5.88                | 8.19  | -        | 6.19 | 2.82 | 2.95 | 5.03 | 4.62 | 4.23    | 4.06 |
| <b>C7</b> | -     | 8.59                | 6.53                | 7.55  | 5.46     | 6.18 | 2.43 | 2.58 | 4.98 | 4.29 | 4.43    | n.a. |
| <b>T8</b> | **    | -                   | -                   | 7.56  | 1.62     | 5.80 | 2.33 | 1.98 | 4.40 | 3.81 | n.a.    | n.a. |

n.o – not observed. n.a – not assigned. \*\* Imino protons of T4 and T8 resonate at 10.42 and 10.90 ppm

**Table S4-** Average values of the torsion angles of the dimeric structure of d<pCGCTCCGT>.

| d<pCGCTCCGT> |          |            |         |            |          |            |          |            |            |            |         |            |         |            |
|--------------|----------|------------|---------|------------|----------|------------|----------|------------|------------|------------|---------|------------|---------|------------|
|              | $\alpha$ |            | $\beta$ |            | $\gamma$ |            | $\delta$ |            | $\epsilon$ |            | $\zeta$ |            | $\chi$  |            |
|              | Average  | Order Par. | Average | Order Par. | Average  | Order Par. | Average  | Order Par. | Average    | Order Par. | Average | Order Par. | Average | Order Par. |
| 1C           |          |            | 167.2   | 0.79       | -17.8    | 0.41       | 145.2    | 0.98       | -123.8     | 0.59       |         |            | -126.0  | 1.00       |
| 2G           | 53.7     | 0.67       | -177.1  | 0.89       | -169.1   | 0.76       | 134.9    | 1.00       | -169.4     | 1.00       | 94.2    | 0.67       | -113.5  | 1.00       |
| 3C           | -77.4    | 0.42       | 177.9   | 0.97       | 76.6     | 0.51       | 108.1    | 0.98       | -104.1     | 0.84       | -99.4   | 0.99       | -134.1  | 1.00       |
| 4T           | -68.0    | 0.99       | 170.2   | 0.93       | 43.7     | 1.00       | 145.1    | 1.00       | -119.6     | 0.92       | 164.7   | 0.86       | -147.2  | 1.00       |
| 5C           | 1.2      | 0.17       | -173.7  | 0.93       | -74.7    | 0.14       | 147.2    | 0.99       | -93.1      | 0.86       | 62.1    | 0.91       | -124.3  | 1.00       |
| 6C           | 144.1    | 0.21       | 177.1   | 0.76       | 175.5    | 0.84       | 129.1    | 0.98       | 168.6      | 0.53       | -23.2   | 0.20       | -115.4  | 0.99       |
| 7G           | -85.0    | 0.61       | 174     | 0.98       | 58.3     | 0.86       | 116.3    | 1.00       | -118.2     | 0.92       | -72.6   | 0.44       | -116.9  | 0.99       |
| 8T           | -61.2    | 0.66       | 171.5   | 1.00       | 51.1     | 0.65       | 148.2    | 1.00       | 52.4       | 0.99       | 145     | 0.94       | -154.2  | 1.00       |
| 9C           | 30.8     | 0.46       | 161.4   | 0.94       | 20.6     | 0.25       | 145.6    | 0.99       | -116.0     | 0.81       | 51.8    | 0.98       | -128.2  | 1.00       |
| 10G          | 59.1     | 0.38       | 176.6   | 0.99       | -178.1   | 0.66       | 136.8    | 1.00       | -169.6     | 1.00       | 77.8    | 0.41       | -110.7  | 1.00       |
| 11C          | -77.6    | 0.42       | 178.8   | 0.95       | 77.9     | 0.50       | 110.2    | 0.99       | -98.4      | 0.97       | -98.9   | 0.99       | -134.6  | 1.00       |
| 12T          | -70.4    | 0.99       | 166.9   | 1.00       | 41.0     | 1.00       | 145.7    | 1.00       | -101.1     | 0.86       | 162.3   | 0.98       | -146.0  | 1.00       |
| 13C          | -50.2    | 0.23       | -169.5  | 0.92       | -172.2   | 0.10       | 143.8    | 0.99       | -116.9     | 0.77       | 45.6    | 0.67       | -125.0  | 1.00       |
| 14C          | 73.2     | 0.27       | -174.6  | 0.85       | 177.5    | 0.68       | 128.5    | 0.99       | 168.2      | 0.53       | -61.9   | 0.22       | -116.5  | 1.00       |
| 15G          | -82.3    | 0.62       | 171.7   | 0.99       | 59.3     | 0.87       | 116.9    | 1.00       | -120.3     | 0.98       | -76.4   | 0.43       | -118.4  | 0.98       |
| 16T          | -70.4    | 1.00       | 171.7   | 1.00       | 49.3     | 1.00       | 143.4    | 1.00       |            |            | 152.2   | 0.98       | -153.6  | 1.00       |

**Table S5-** Average values of the torsion angles of the dimeric structure of d(TGCTTCGT).

| d(TGCTTCGT) |          |            |         |            |          |            |          |            |            |            |         |            |         |            |
|-------------|----------|------------|---------|------------|----------|------------|----------|------------|------------|------------|---------|------------|---------|------------|
|             | $\alpha$ |            | $\beta$ |            | $\gamma$ |            | $\delta$ |            | $\epsilon$ |            | $\zeta$ |            | $\chi$  |            |
|             | Average  | Order Par. | Average | Order Par. | Average  | Order Par. | Average  | Order Par. | Average    | Order Par. | Average | Order Par. | Average | Order Par. |
| 1T          |          |            |         |            | 138.2    | 0.35       | 128.2    | 0.90       | -91.7      | 0.99       |         |            | -42.2   | 1.00       |
| 2G          | -161.0   | 0.13       | -178.1  | 0.97       | 82.3     | 0.25       | 133.6    | 0.95       | 139.5      | 0.47       | -83.6   | 0.97       | -106.1  | 1.00       |
| 3C          | -105.0   | 0.75       | -177.9  | 1.00       | 47.5     | 1.00       | 99.5     | 0.97       | -81.6      | 0.59       | -52.2   | 0.30       | -126.6  | 1.00       |
| 4T          | -31.4    | 0.58       | 125.4   | 0.74       | 23.7     | 0.87       | 84.2     | 0.99       | -108.0     | 0.29       | 122.7   | 0.54       | -167.1  | 0.99       |
| 5T          | 7.2      | 0.26       | 143.0   | 0.73       | -149.0   | 0.52       | 114.8    | 0.92       | -129.4     | 0.48       | 122.5   | 0.42       | -99.4   | 0.96       |
| 6C          | 91.0     | 0.54       | -167.0  | 0.87       | 179.4    | 0.82       | 88.2     | 0.99       | 66.7       | 0.67       | 125.0   | 0.16       | -123.3  | 1.00       |
| 7G          | -143.6   | 0.68       | -172.6  | 0.86       | 42.8     | 0.99       | 93.1     | 0.96       | -27.6      | 0.62       | 51.6    | 0.64       | -114.7  | 0.99       |
| 8T          | -139.3   | 0.67       | -162.0  | 0.71       | 41.1     | 0.83       | 100.5    | 1.00       |            |            | 76.3    | 0.45       | -153.8  | 1.00       |
| 9T          |          |            |         |            | 159.2    | 0.43       | 129.5    | 0.71       | -87.3      | 0.99       |         |            | -42.2   | 1.00       |
| 10G         | 56.5     | 0.71       | -173.0  | 0.90       | -160.4   | 0.84       | 145.0    | 0.99       | 169.1      | 0.71       | -89.0   | 0.96       | -104.3  | 1.00       |
| 11C         | -88.4    | 0.82       | 178.3   | 1.00       | 48.1     | 1.00       | 106.6    | 1.00       | -88.1      | 0.99       | -82.0   | 0.61       | -126.5  | 1.00       |
| 12T         | -50.5    | 0.69       | 131.1   | 0.78       | 36.0     | 1.00       | 85.0     | 1.00       | -108.7     | 0.50       | 126.2   | 0.93       | -171.2  | 1.00       |
| 13T         | 44.6     | 0.55       | -175.7  | 0.56       | -141.3   | 0.33       | 106.8    | 0.86       | -149.4     | 0.82       | 100.7   | 0.56       | -104.2  | 0.97       |
| 14C         | 67.0     | 0.63       | -175.5  | 0.93       | 173.9    | 0.65       | 92.1     | 0.99       | 119.6      | 0.35       | 110.9   | 0.54       | -122.7  | 1.00       |
| 15G         | -110.7   | 0.61       | -174.0  | 0.88       | 43.5     | 0.99       | 96.0     | 0.97       | -45.9      | 0.65       | -11.4   | 0.37       | -118.6  | 0.99       |
| 16T         | -113.0   | 0.76       | -156.1  | 0.85       | 47.8     | 0.87       | 98.9     | 1.00       |            |            | 82.4    | 0.64       | -155.6  | 1.00       |

**Table S6-** Average values of the torsion angles of the dimeric structure of d(TCGTTGCT).

| d(TCGTTGCT) |          |            |         |            |          |            |          |            |            |            |         |            |         |            |
|-------------|----------|------------|---------|------------|----------|------------|----------|------------|------------|------------|---------|------------|---------|------------|
|             | $\alpha$ |            | $\beta$ |            | $\gamma$ |            | $\delta$ |            | $\epsilon$ |            | $\zeta$ |            | $\chi$  |            |
|             | Average  | Order Par. | Average | Order Par. | Average  | Order Par. | Average  | Order Par. | Average    | Order Par. | Average | Order Par. | Average | Order Par. |
| 1T          |          |            | -131.2  | 0.12       | -159.7   | 0.73       | 102.5    | 0.98       | -109.9     | 0.73       |         |            | -123.6  | 0.99       |
| 2C          | 94.7     | 0.37       | 146.9   | 0.36       | -116.9   | 0.44       | 108.8    | 1.00       | -179.5     | 0.99       | 101.8   | 0.41       | -112.1  | 1.00       |
| 3G          | -78.6    | 0.99       | 171.1   | 0.99       | 54.6     | 0.99       | 100.6    | 0.99       | -98.3      | 0.72       | -95.3   | 1.00       | -143.8  | 1.00       |
| 4T          | 10.5     | 0.33       | -176.2  | 0.97       | 118.5    | 0.18       | 154.0    | 0.99       | -120.4     | 0.90       | 144.0   | 0.70       | -152.1  | 0.99       |
| 5T          | -32.3    | 0.44       | 165.6   | 0.54       | 160.5    | 0.64       | 122.2    | 0.98       | -59.2      | 0.57       | 63.5    | 0.81       | -84.5   | 0.97       |
| 6G          | -59.5    | 0.39       | -118.9  | 0.47       | -58.3    | 0.70       | 134.1    | 0.99       | 168.1      | 0.84       | 34.4    | 0.26       | -105.4  | 1.00       |
| 7C          | -80.8    | 0.22       | 177.0   | 0.95       | 94.5     | 0.48       | 77.0     | 0.99       | 171.9      | 0.99       | -84.6   | 0.83       | -143.6  | 1.00       |
| 8T          | -51.1    | 1.00       | -167.7  | 0.99       | 47.3     | 0.99       | 85.4     | 0.99       |            |            | -105.6  | 0.99       | -159.8  | 1.00       |
| 9T          |          |            | 92.7    | 0.34       | -177.2   | 0.54       | 101.2    | 0.98       | -114.5     | 0.79       |         |            | -123.6  | 1.00       |
| 10C         | 86.3     | 0.37       | 168.0   | 0.44       | -133.5   | 0.32       | 108.7    | 0.99       | -178.3     | 0.81       | -34.0   | 0.22       | -113.3  | 0.99       |
| 11G         | -83.6    | 0.90       | 171.0   | 0.97       | 55.5     | 0.98       | 97.9     | 0.99       | -109.3     | 0.66       | -92.7   | 0.81       | -141.4  | 1.00       |
| 12T         | -17.8    | 0.38       | -175.4  | 0.97       | 78.4     | 0.28       | 150.3    | 0.99       | -116.6     | 0.73       | 157.4   | 0.60       | -151.7  | 0.99       |
| 13T         | -4.0     | 0.30       | 134.0   | 0.61       | 144.7    | 0.46       | 119.5    | 0.94       | -83.4      | 0.44       | 48.7    | 0.63       | -89.1   | 0.96       |
| 14G         | -75.2    | 0.34       | -137.8  | 0.58       | -43.6    | 0.70       | 137.0    | 1.00       | 173.7      | 1.00       | 38.3    | 0.30       | -108.2  | 1.00       |
| 15C         | -65.4    | 0.99       | 165.4   | 1.00       | 51.2     | 0.99       | 76.4     | 1.00       | 173.9      | 0.99       | -86.7   | 1.00       | -139.9  | 1.00       |
| 16T         | -46.4    | 0.86       | -168.0  | 0.99       | 37.5     | 0.86       | 89.8     | 0.96       |            |            | -106.0  | 0.98       | -155.7  | 0.99       |

**Table S7:** Local helical parameters for the dimeric structure of d<pCGCTCCGT>, d(TGCTTCGT), and d(TCGTTGCT)

| d<pCGCTCCGT> |              |     |              |     |             |     |                 |     |                 |     |                    |     |  |
|--------------|--------------|-----|--------------|-----|-------------|-----|-----------------|-----|-----------------|-----|--------------------|-----|--|
| Step         | Shift Dx (Å) |     | Slide Dy (Å) |     | Rise Dz (Å) |     | Tilt $\tau$ (°) |     | Roll $\rho$ (°) |     | Twist $\Omega$ (°) |     |  |
|              | AVERAGE      | SD  | AVERAGE      | SD  | AVERAGE     | SD  | AVERAGE         | SD  | AVERAGE         | SD  | AVERAGE            | SD  |  |
| G2/C3        | -0.1         | 0.2 | -1.1         | 0.2 | 3.2         | 0.1 | 3.9             | 1.6 | 3.3             | 3.2 | 25.4               | 1.5 |  |
| C6/G7        | 0.2          | 0.2 | -0.6         | 0.1 | 3.4         | 0.1 | -1.8            | 1.3 | -9.4            | 1.5 | 32.3               | 1.5 |  |
| C11/G10      | 0.1          | 0.2 | -1.1         | 0.2 | 3.2         | 0.1 | -3.3            | 2.2 | 3.2             | 2.2 | 24.9               | 1.7 |  |
| G15/C14      | -0.6         | 0.3 | -0.7         | 0.2 | 3.3         | 0.3 | -3.3            | 3.4 | 6.7             | 3.4 | 31.9               | 3.0 |  |

| d(TGCTTCGT) |              |     |              |     |             |     |                 |     |                 |     |                    |     |  |
|-------------|--------------|-----|--------------|-----|-------------|-----|-----------------|-----|-----------------|-----|--------------------|-----|--|
| Step        | Shift Dx (Å) |     | Slide Dy (Å) |     | Rise Dz (Å) |     | Tilt $\tau$ (°) |     | Roll $\rho$ (°) |     | Twist $\Omega$ (°) |     |  |
|             | AVERAGE      | SD  | AVERAGE      | SD  | AVERAGE     | SD  | AVERAGE         | SD  | AVERAGE         | SD  | AVERAGE            | SD  |  |
| G2/C3       | -0.4         | 0.2 | -1.0         | 0.2 | 4.2         | 0.1 | -10.6           | 1.5 | 11.6            | 2.6 | 28.5               | 2.2 |  |
| C6/G7       | -0.2         | 0.1 | -0.8         | 0.2 | 3.1         | 0.2 | 5.0             | 2.6 | 7.4             | 4.2 | 24.7               | 1.6 |  |
| C11/G10     | 0.4          | 0.2 | -1.0         | 0.1 | 4.1         | 0.2 | 9.8             | 1.8 | 12.2            | 3.0 | 28.0               | 1.7 |  |
| G15/C14     | 0.2          | 0.2 | -0.8         | 0.2 | 3.1         | 0.2 | -5.2            | 2.3 | 9.1             | 4.9 | 24.1               | 1.9 |  |

| d(TCGTTGCT) |              |     |              |     |             |     |                 |     |                 |     |                    |     |  |
|-------------|--------------|-----|--------------|-----|-------------|-----|-----------------|-----|-----------------|-----|--------------------|-----|--|
| Step        | Shift Dx (Å) |     | Slide Dy (Å) |     | Rise Dz (Å) |     | Tilt $\tau$ (°) |     | Roll $\rho$ (°) |     | Twist $\Omega$ (°) |     |  |
|             | AVERAGE      | SD  | AVERAGE      | SD  | AVERAGE     | SD  | AVERAGE         | SD  | AVERAGE         | SD  | AVERAGE            | SD  |  |
| C2/G3       | 0.1          | 0.1 | -0.8         | 0.1 | 3.3         | 0.1 | -1.2            | 2.5 | 9.4             | 5.5 | 37.5               | 1.3 |  |
| G6/C7       | 0.2          | 0.2 | -0.6         | 0.1 | 3.4         | 0.1 | -1.8            | 1.3 | -9.4            | 1.5 | 32.3               | 1.5 |  |
| G11/C10     | -0.4         | 0.2 | -0.7         | 0.2 | 3.4         | 0.3 | 1.5             | 4.0 | 4.7             | 8.2 | 38.0               | 1.1 |  |
| C15/G14     | -0.1         | 0.1 | -0.6         | 0.1 | 3.5         | 0.1 | 3.2             | 1.4 | -10.8           | 2.3 | 32.7               | 1.7 |  |

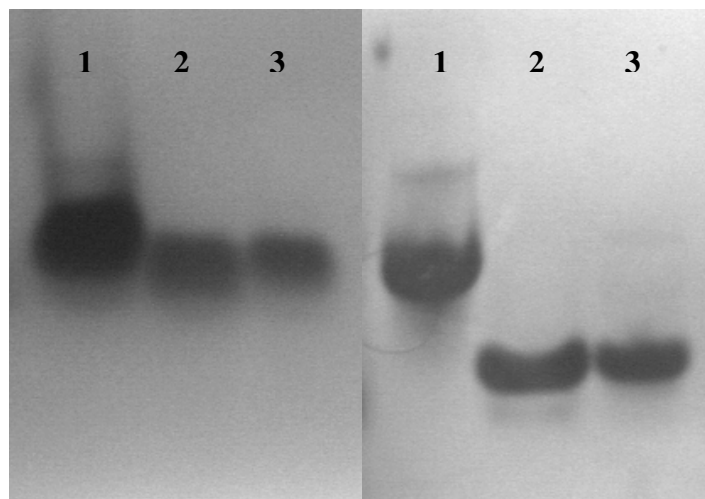

**Figure S1** - Nondenaturing polyacrylamide gel electrophoresis of d(TGCTTCGT) and d(TCGTTGCT). The gel on the left is a 20% polyacrilamide containing 90 mM Tris-borate (TB), run under experimental conditions where the structures are dimeric (2 mM oligonucleotide concentration, 100 mM Na<sup>+</sup>, 50 mM Mg<sup>2+</sup>, T= 4°C). The gel on the right is a nondenaturing 20% polyacrilamide gel containing 90 mM Tris-borate-EDTA (TBE) run under conditions where the two linear oligonucleotides do not form dimeric structures (100 μM, oligonucleotide concentration, phosphate buffer 10 mM). The control oligonucleotide (1) is the trombin aptamer quadruplex in a 10mM KCl buffer. We have chosen this oligonucleotide as control because it is a 15mer monomeric quadruplex with a globular shape similar to the dimeric minor groove quadruplex studied in this work. As can be seen, both d(TGCTTCGT) (2) and d(TCGTTGCT) (3), migrate in the gel as monomer or dimers depending on the experimental conditions, but not as a higher order structure.

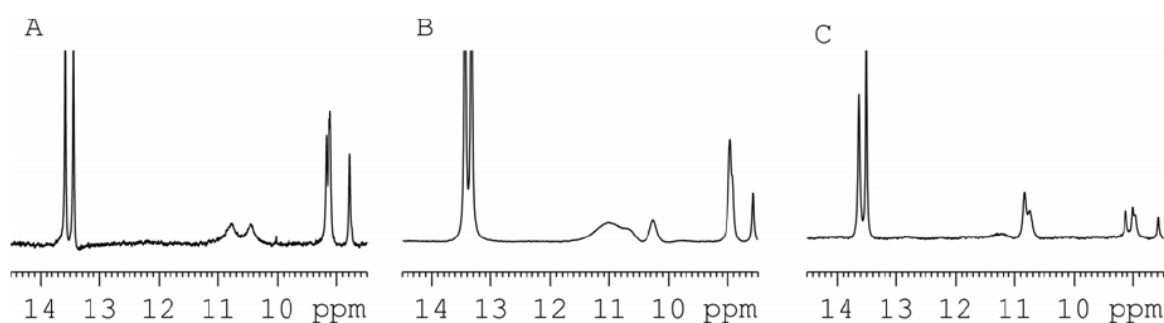

**Figure S2** - Imino region of the one dimensional NMR spectra of d<pCGCTCCGT> (A), d(TGCTTCGT) (B) and d(TCGTTGCT) (C) in H<sub>2</sub>O at 5°C (25 mM sodium phosphate buffer, pH 7, 100 mM NaCl, 10 mM MgCl<sub>2</sub>) acquired with a jump-and-return pulse sequence with a maximum excitation profile at 11.5 ppm. The broad signals observed between 10-11 ppm correspond to the imino protons of the unpaired thymines. These protons exchange rapidly with the solvent and they are not observed in spectra acquired with a WATERGATE pulse sequence for solvent suppression shown in Figure 2 of the main text.

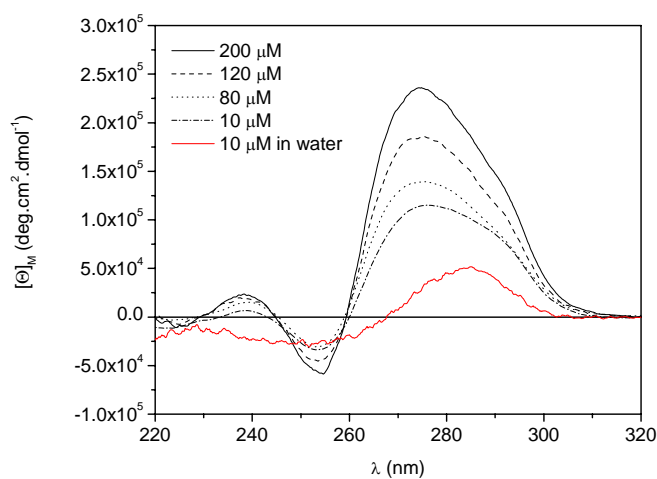

**Figure S3** – Black lines: CD spectra of d<pCGCTCCGT> at different oligonucleotide concentrations recorded in 25 mM sodium phosphate buffer, pH 7, 100 mM NaCl, 10 mM MgCl<sub>2</sub>. Red line. CD spectra of d<pCGCTCCGT> at 10 μM oligonucleotide concentration in water (no salt added), under these conditions the structure of d<pCGCTCCGT> is mainly monomeric.







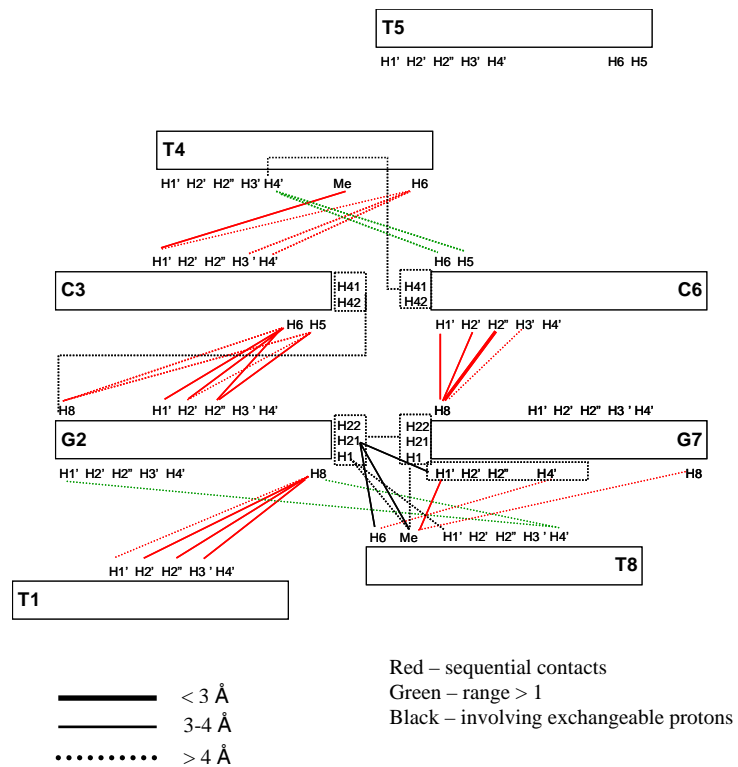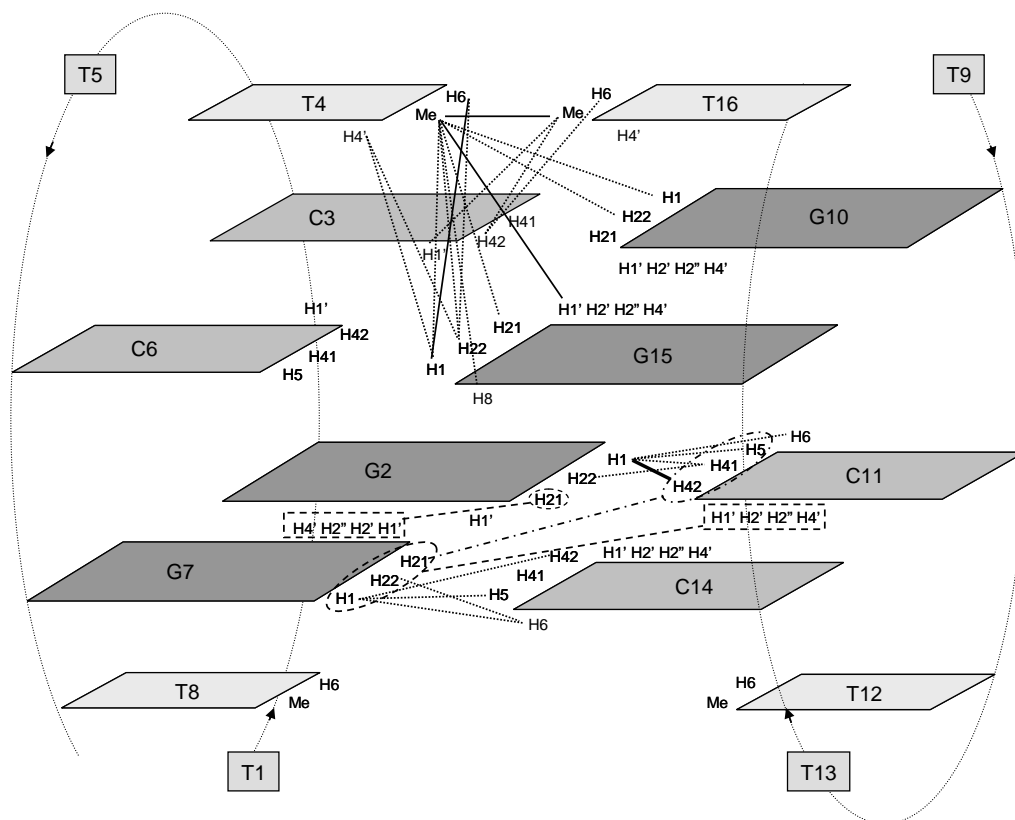

**Figure S6** - Schematic representation of intra- (top) and inter-molecular (bottom) distance constraints for d(TGCTTCGT). Constraints are classified in three categories according to their upper distance limit.

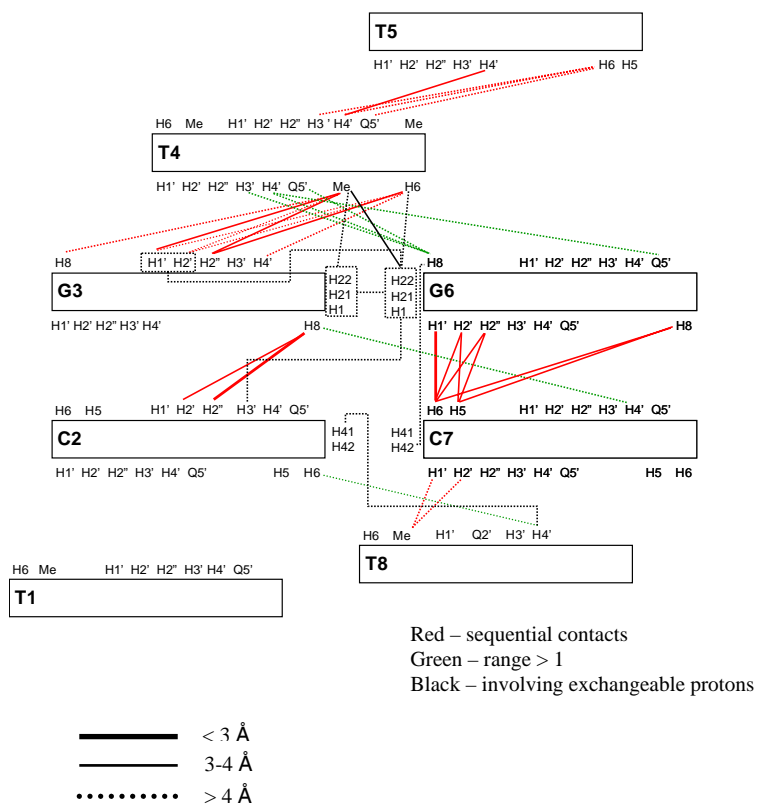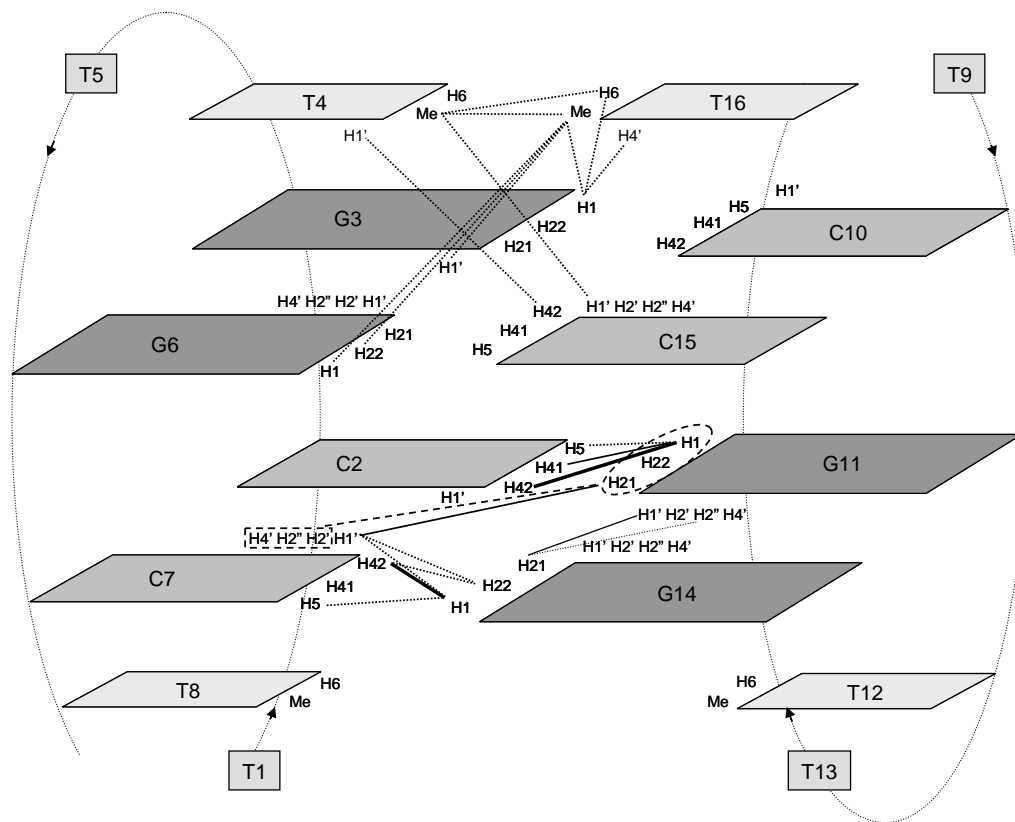

**Figure S7** - Schematic representation of intra- (top) and inter-molecular (bottom) distance constraints for d(TCGTTGCT). Constraints are classified in three categories according to their upper distance limit.

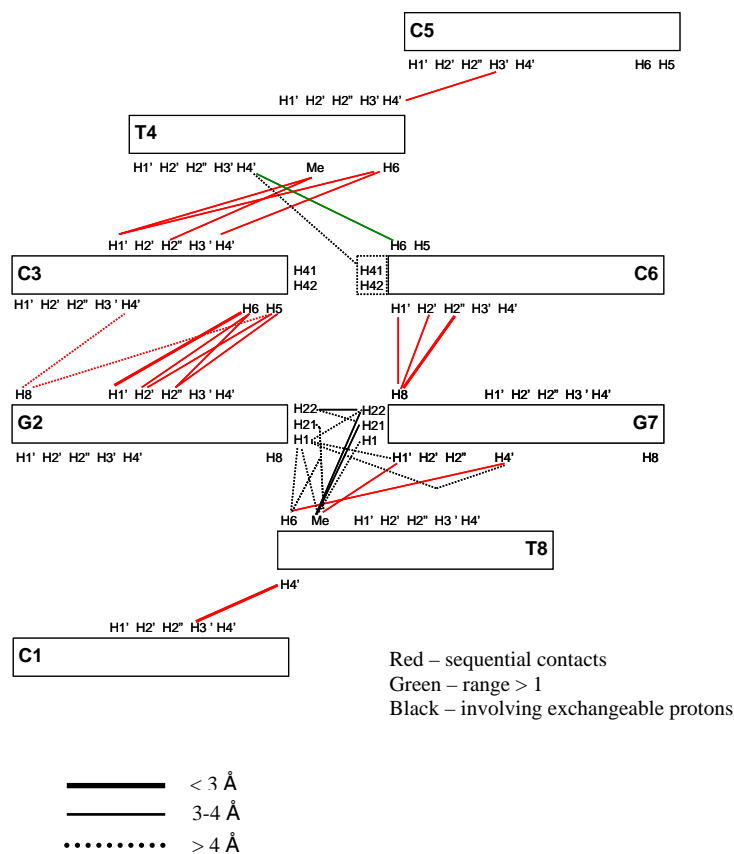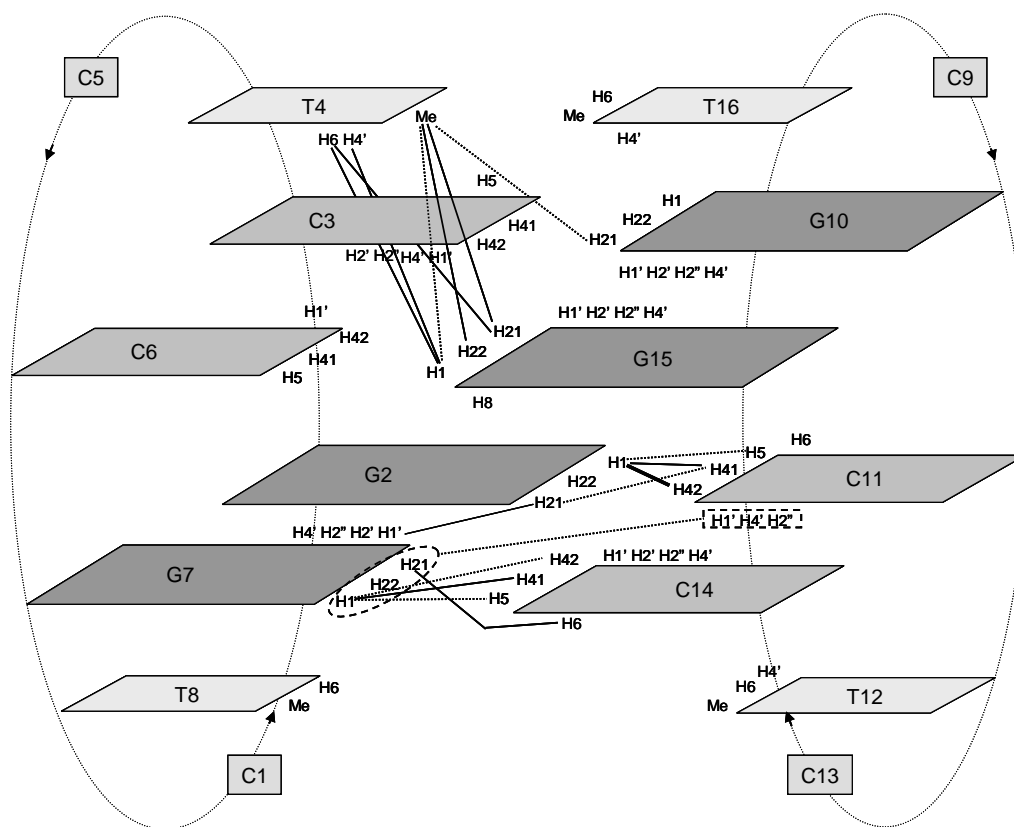

**Figure S8** - Schematic representation of intra- (top) and inter-molecular (bottom) distance constraints for  $d\langle pCGCTCCGT \rangle$ . Constraints are classified in three categories according to their upper distance limit.

**Distinction between intra- and inter-molecular distances:** The symmetry of these dimeric structures implies that for every correlation cross-peak observed between two protons, two different distance constraints are possible, the intra- and the inter-molecular distance constraints. A number of cross-peaks can be unequivocally assigned as intra- or inter-molecular distances. For the rest of the cross-peaks, a preliminary model of the structure based on similar structures is used to decide between intra- or inter-molecular contacts and, with the restrictions obtained a first round of preliminary structure calculation with DYANA is performed. Those distance constraints that are systematically violated ( $> 1\text{\AA}$ ) are reassigned and again introduced in the structure calculation. This process is repeated several times until a consistent distance constraints collection is obtained. The cross-peaks that remain ambiguous after this process are not included in the final structure calculations.
